# Supplementary material
Source: Springer Nature journal article supplement (https://www.springermedizin.de/resource/supplementary/13002_2009_195_MOESM3_ESM.pdf/9627370)

Wild medicinal  
plants  
populations  
declining, 20%

some  
medicinal plant  
species are  
extinct, 4%

Wild medicinal  
plants  
populations not  
declining, 80%

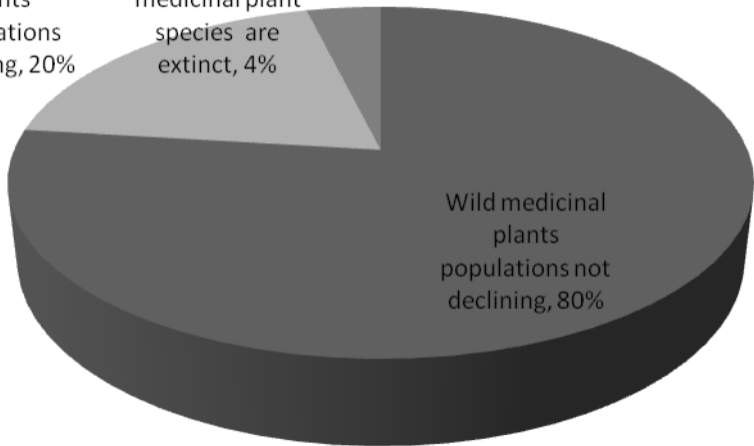

Supplement: MOESM3 [file 9627370]
